# Supplementary material for: A novel iodination-triggered competitive coordination mechanism: indirect detection of Hg2+and I−using a simple copillar[5]arene-based fluorometric sensor
Source: Royal Society of Chemistry journal article supplement (doi:10.1039/c7nj01856h), 2017-01-01
Supplement: c7nj01856h1.pdf [file c7nj01856h1.pdf]

## *Electronic Supplementary Material*

### **A novel iodization triggered competitive coordination mechanism: indirect detection of $\text{Hg}^{2+}$ and $\text{I}^-$ using a simple copillar[5]arene-based fluorometric sensor**

Jin-Fa Chen, Xiao-Bin Cheng, Hui Li, Bing-Bing Han, Qi Lin\*, You-Ming Zhang, Hong Yao, Tai-Bao Wei\*

*Key Laboratory of Eco-Environment-Related Polymer Materials, Ministry of Education of China; Key Laboratory of Polymer Materials of Gansu Province; College of Chemistry and Chemical Engineering, Northwest Normal University, Lanzhou, Gansu, 730070, P. R. China*

## 1. Materials and methods

1, 4-Dimethoxybenzene, boron trifluoride ethyl ether complex and 1,4-dibromobutane were analytical grade, which were purchased from Alfa Aesar and used as received. Solvents were either employed as purchased or dried by  $\text{CaCl}_2$ .  $^1\text{H}$  NMR spectra were recorded on a Mercury-600BB spectrometer at 600 MHz and  $^{13}\text{C}$  NMR spectra were recorded on a Mercury-600BB spectrometer at 150 MHz. Chemical shifts are reported in ppm downfield from tetramethylsilane (TMS,  $\delta$  scale with solvent resonances as internal standards). Melting points were measured on an X-4 digital melting-point apparatus (uncorrected). Mass spectra were performed on a Bruker Esquire 3000 plus mass spectrometer (Bruker-FranzenAnalytik GmbH Bremen, Germany) equipped with ESI interface and ion trap analyzer. Fluorescence spectra were recorded on a Shimadzu RF-5301PC spectrofluorophotometer.

## 2. Synthesis of copillar[5]arene DBP5

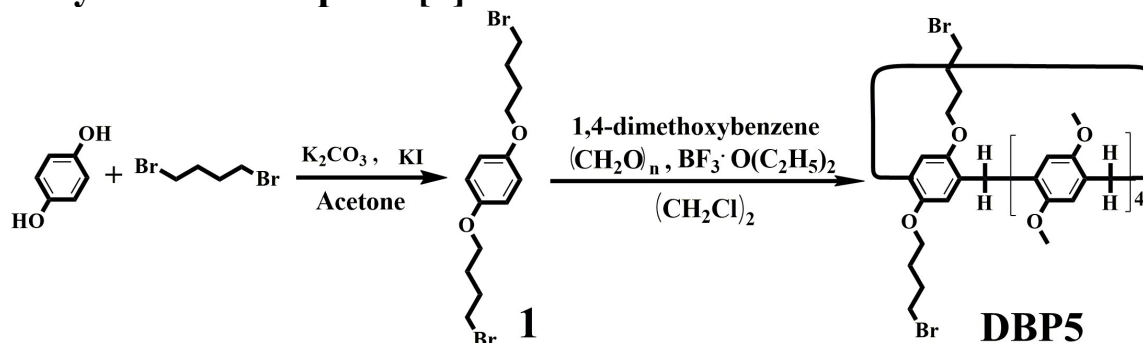

**Scheme S1** Synthesis of copillar[5]arene **DBP5**.

**Synthesis of 1,4-bis(4-bromobutoxy)benzene 1:** Hydroquinone (2.3 g, 20.0 mmol),  $K_2CO_3$  (16.6 g, 120 mmol), KI (6.6 g, 40 mmol), 1,4-dibromobutane (34.6 g, 160 mmol) and acetone (400.0 mL) were added in a 500 mL round-bottom flask stirred at room temperature. The reaction mixture was stirred at reflux for 2.5 days. After the solid was filtered off, the solvent was evaporated and the residue was dissolved in  $CH_2Cl_2$ . Column chromatography (silica gel; petroleum ether :  $CH_2Cl_2$  = 10 : 1) afforded a white solid (6.0 g, 80%). Mp 83–85°C.  $^1H$  NMR (600 MHz,  $CDCl_3$ )  $\delta$  6.83 (d,  $J$  = 0.8 Hz, 4H), 3.96 (t,  $J$  = 6.0 Hz, 4H), 3.52–3.25 (m, 4H), 2.10–1.88 (m, 8H).  $^{13}C$  NMR (151 MHz,  $CDCl_3$ )  $\delta$  153.07 (s), 115.49 (d,  $J$  = 28.1 Hz), 67.35 (d,  $J$  = 30.2 Hz), 33.52 (s), 29.50 (s), 28.00 (s). ESI-MS  $m/z$ :  $M^+$  Calcd for  $C_{14}H_{20}O_2Br_2$  379.9804; Found 379.9799.

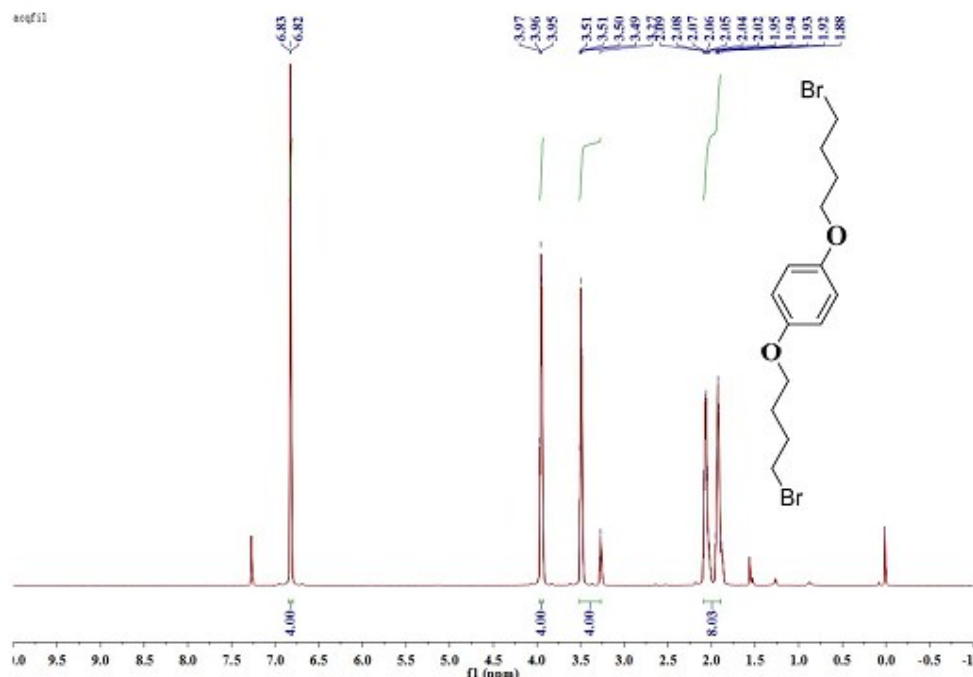

**Fig. S1** <sup>1</sup>H NMR spectra (600 MHz, CDCl<sub>3</sub>) of 1,4-bis (4-bromobutoxyl)benzene **1**.

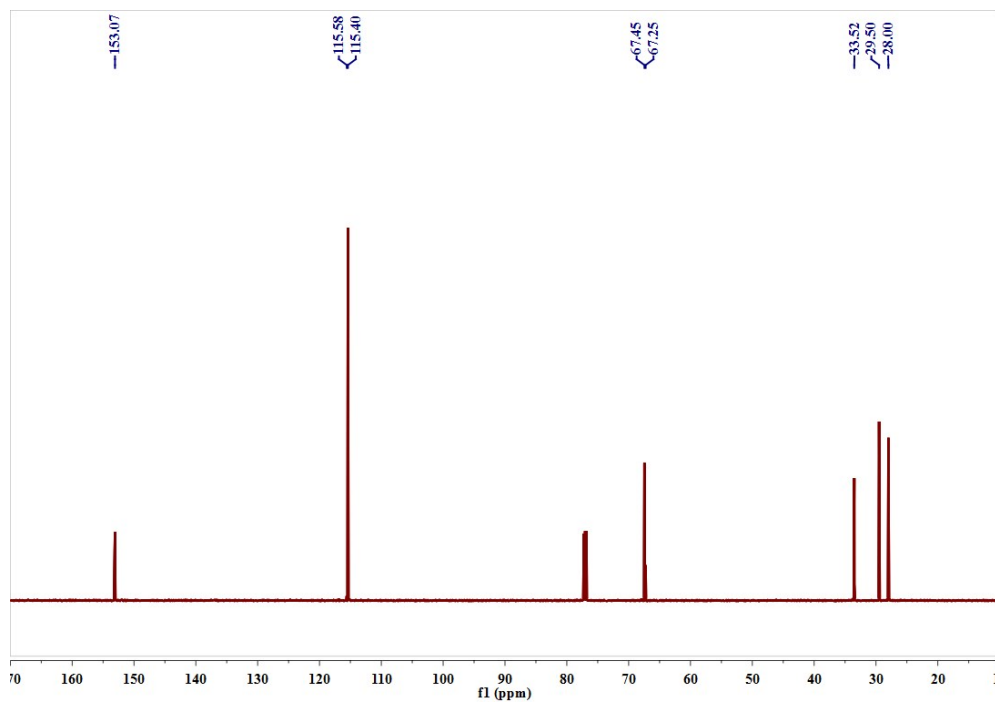

**Fig. S2** <sup>13</sup>C NMR spectra (151 MHz, CDCl<sub>3</sub>) of 1,4-bis (4-bromobutoxyl)benzene **1**.

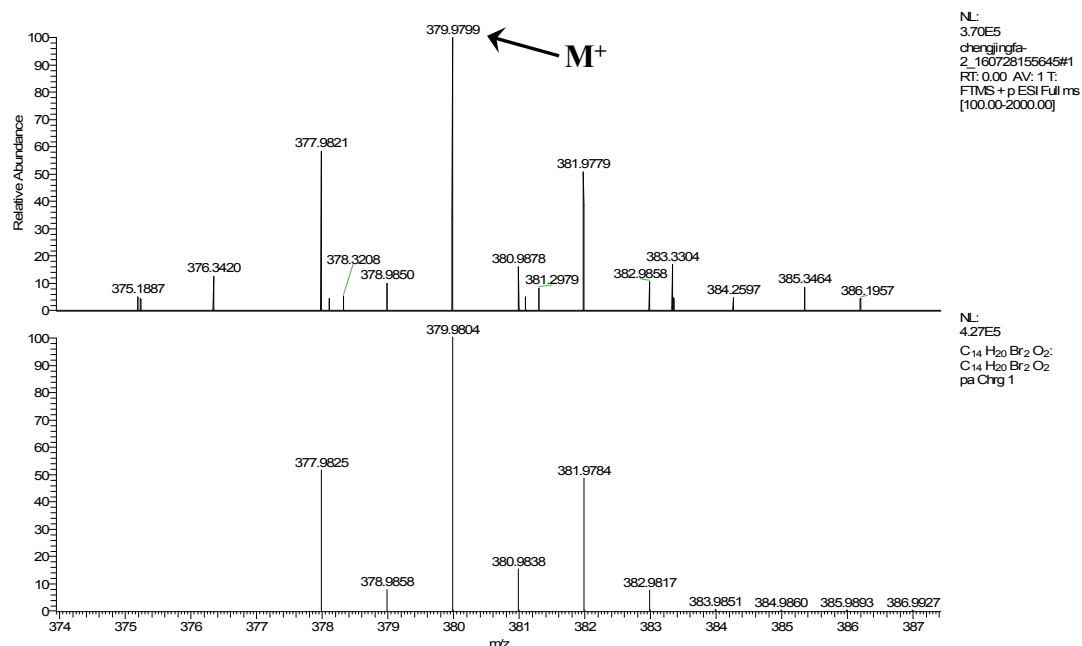

**Fig. S3** High resolution mass data of 1,4-bis (4-bromobutoxyl) benzene **1**.

**Synthesis of a copillar[5]arene DBP5:** To a solution of 1,4-bis (4-bromobutoxy) benzene (1.9 g, 5.0 mmol) and 1,4-dimethoxybenzene (2.76 g, 20.0 mmol) in 1, 2-dichloroethane (200 mL), paraformaldehyde (0.75 g, 25.0 mmol) was added under nitrogen atmosphere. Then boron trifluoride diethyl etherate (6.75 mL, 25 mmol) was added to the solution and the mixture was stirred at room temperature for 4 h and concentrated by rotary evaporation. The resultant oil was dissolved in CH<sub>2</sub>Cl<sub>2</sub> and washed twice with H<sub>2</sub>O. The organic layer was dried over anhydrous Na<sub>2</sub>SO<sub>4</sub> and evaporated to afford the crude product, which was isolated by flash column chromatography using petroleum ether/ethyl acetate (20 : 1, v/v) to give **DBP5** (1.69 g, 34%) as a white solid. Mp 187–189 °C. <sup>1</sup>H NMR (600 MHz, CDCl<sub>3</sub>) δ 6.84–6.74 (m, 10H), 3.87 (t, *J* = 5.9 Hz, 4H), 3.83–3.78 (m, 10H), 3.72 (t, *J* = 19.9 Hz, 24H), 3.33 (s, 4H), 1.94 (s, 4H), 1.84 (s, 4H). <sup>13</sup>C NMR (151 MHz, CDCl<sub>3</sub>) δ 150.80 (s), 150.75 (s), 150.70 (s), 150.58 (s), 149.84 (s), 128.44 (s), 128.30 (s), 128.08 (s), 114.89 (s), 114.15 (s), 113.92 (s), 113.71 (s), 67.32 (s), 55.95 (d, *J* = 3.6 Hz), 55.76 (s), 55.70 (s), 33.34 (s), 30.55 (s), 29.75 (s), 29.48 (d, *J* = 5.2 Hz), 29.19 (s), 28.32 (s). ESI-MS *m/z*: (M+NH<sub>4</sub>)<sup>+</sup> Calcd for C<sub>51</sub>H<sub>64</sub>O<sub>10</sub>Br<sub>2</sub>N 1010.2871; Found 1010.2878.

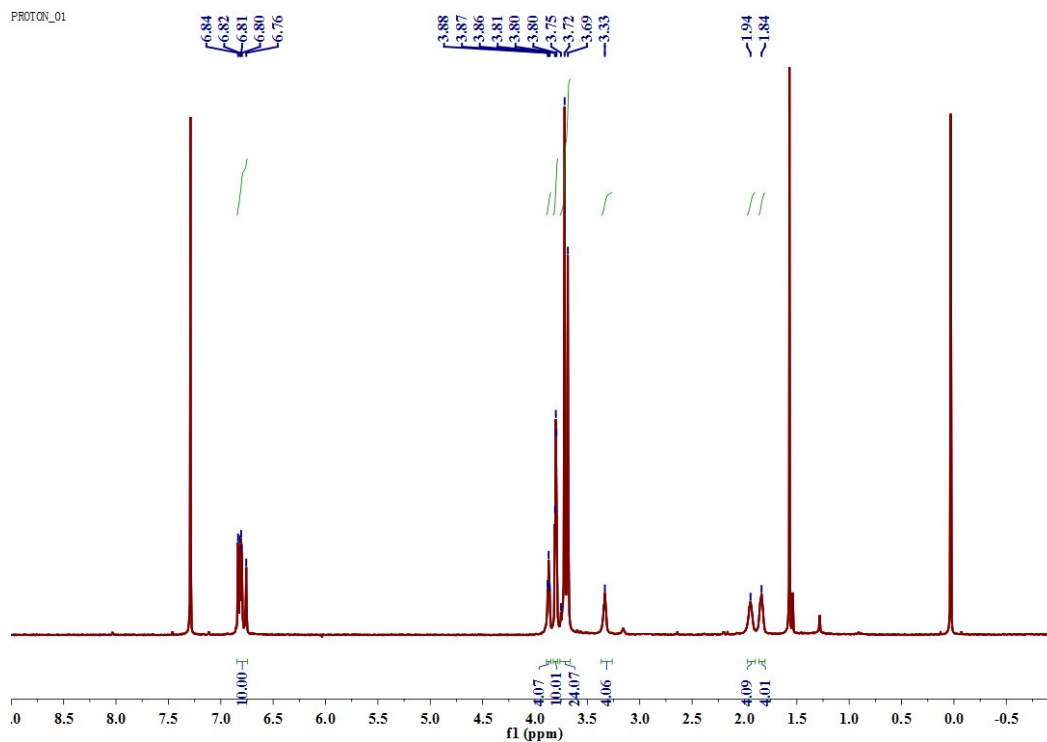

**Fig. S4**  $^1\text{H}$  NMR spectra(600 MHz,  $\text{CDCl}_3$ ) of a copillar[5]arene **DBP5**.

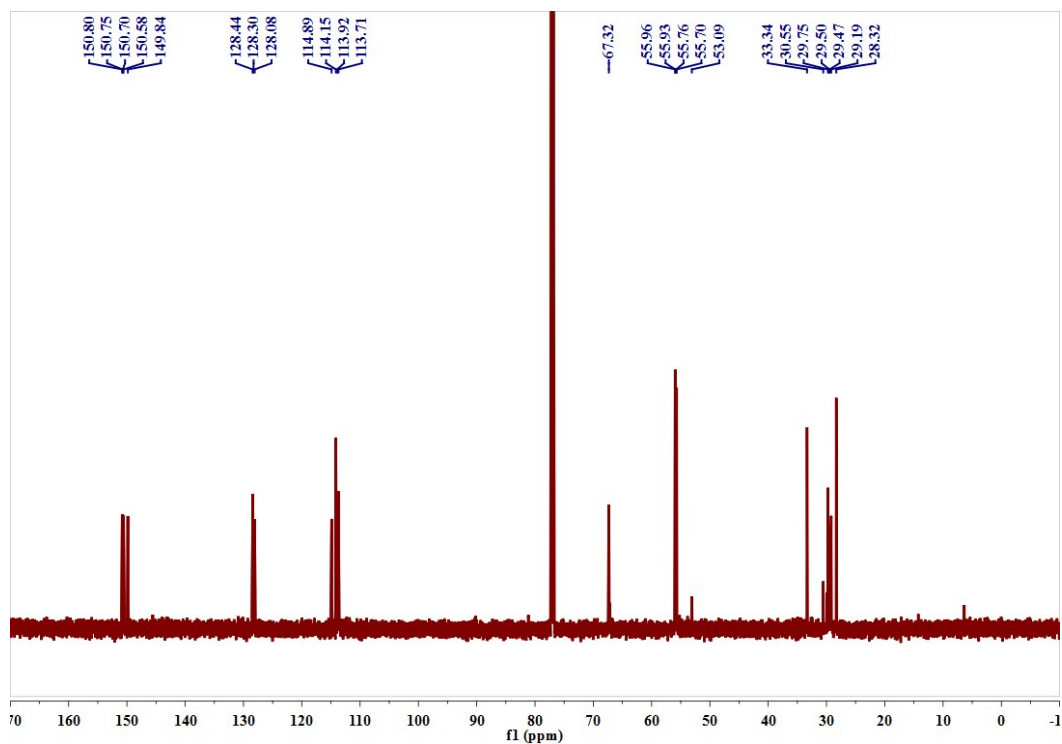

**Fig. S5**  $^{13}\text{C}$  NMR spectra(151 MHz,  $\text{CDCl}_3$ ) of a copillar[5]arene **DBP5**.

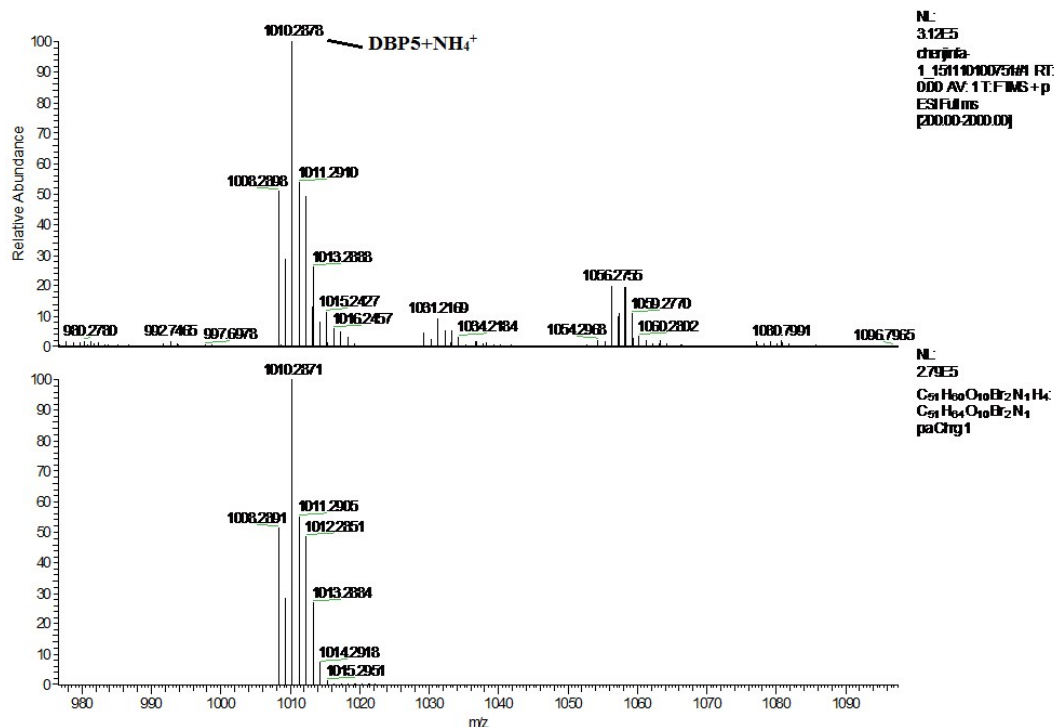

**Fig. S6** High resolution mass data of a copillar[5]arene **DBP5**.

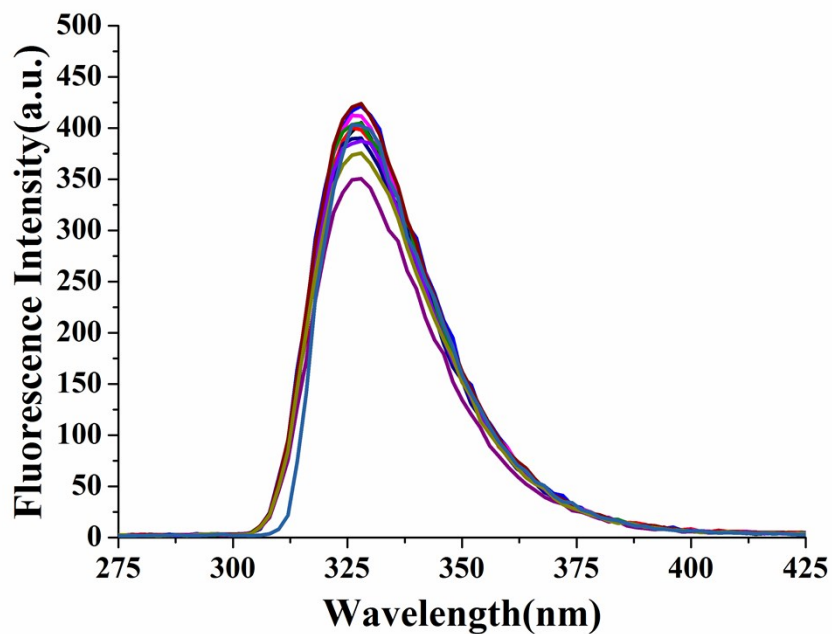

**Fig. S7** Fluorescence spectral response of **DBP5** ( $2 \times 10^{-4}$  M) in H<sub>2</sub>O/DMSO (1 : 9, v/v) solution upon addition of 2.5 equiv. of anions ( $\lambda_{\text{ex}} = 295$  nm).

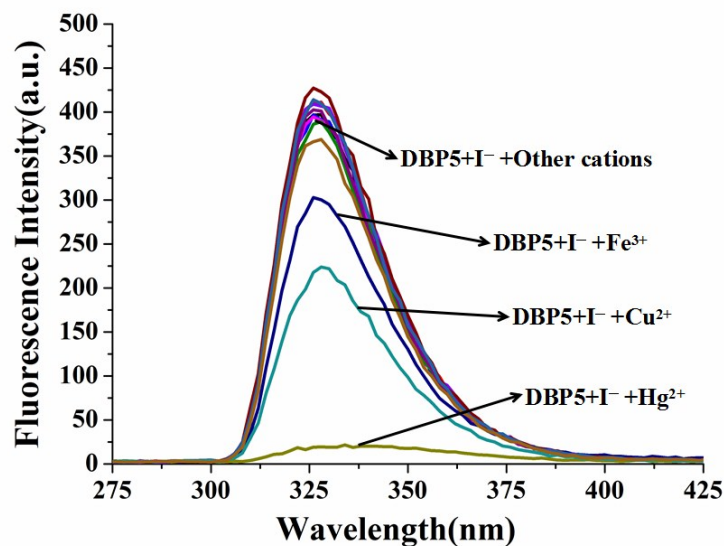

**Fig. S8** Fluorescence spectral response of **DBP5I** ( $[\text{DBP5}]/[\text{I}^-] = 1 : 2.5$ ,  $[\text{DBP5}] = 2 \times 10^{-4} \text{ M}$ ) in  $\text{H}_2\text{O}/\text{DMSO}$  (1 : 9, v/v) solution upon addition of 0.25 equiv. of different cations ( $\lambda_{\text{ex}} = 295 \text{ nm}$ ).

### Determination of the detection limit

We use the  $3\delta$  way to figure out the detection limit. The process of the analysis as follows.

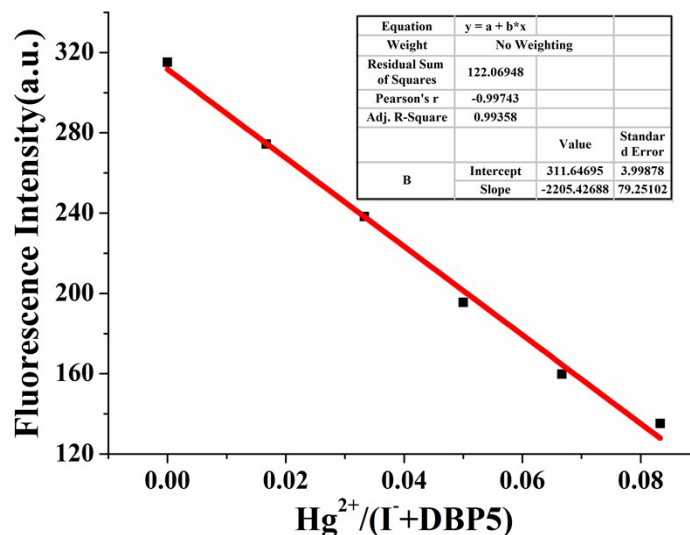

**Fig. S9** The photograph of the linear range.

Linear Equation:  $Y = -2205.42688X + 311.64695$   $R^2 = 0.99358$

$S = 2205.427 \times 10^6$

$$\delta = \sqrt{\frac{\sum (x_i - \bar{x})^2}{n-1}} = 27.42 (n = 30)$$

$$\text{LOD} = 3\delta/S = 3.73 \times 10^{-8} \text{ M}$$



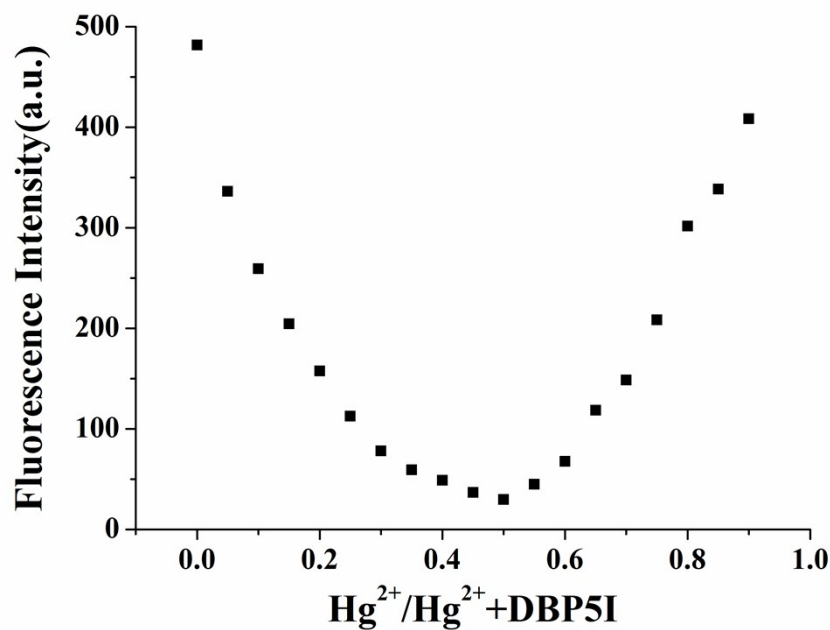

**Fig. S10** The Job's plot examined between  $\text{Hg}^{2+}$  and **DBP5I**, indicating the 1 : 1 stoichiometry, which was carried out by fluorescence spectra ( $\lambda_{\text{ex}} = 295$  nm).

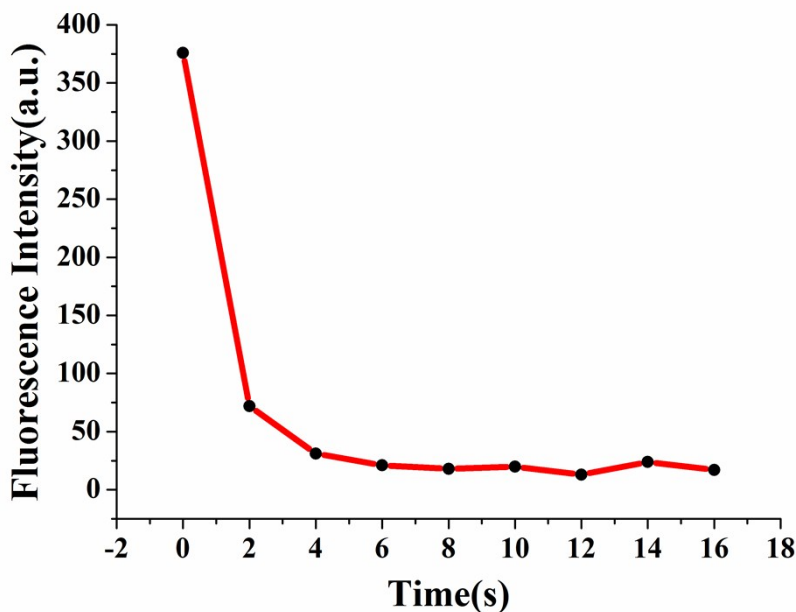

**Fig. S11** Time-dependent of **DBP5I** ( $2 \times 10^{-4}$  M) upon addition of  $\text{Hg}^{2+}$  (0.25 equiv.) in  $\text{H}_2\text{O}/\text{DMSO}$  (1 : 9, v/v) with a plot of the fluorescence intensity that is estimated as the peak height at 328 nm.

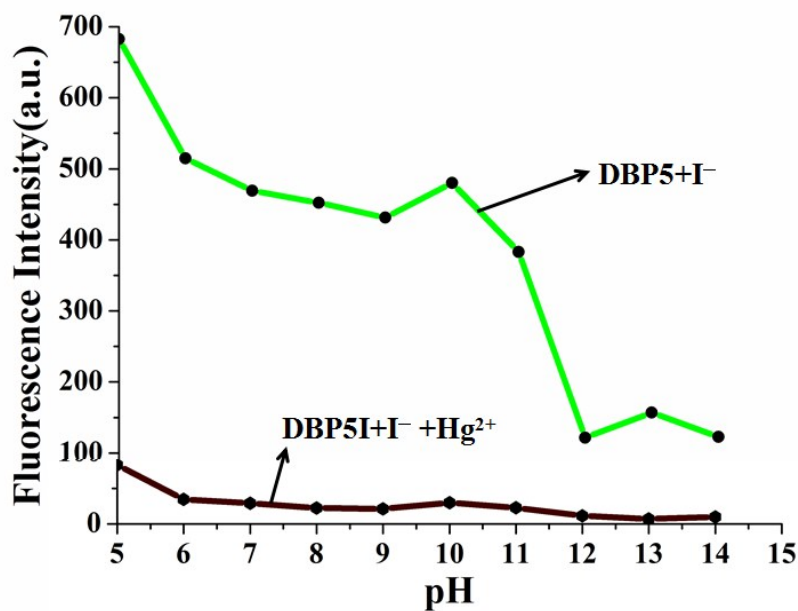

**Fig. S12** Influence of pH on the fluorescence of **DBP5I** ( $2 \times 10^{-4}$  M) with  $\text{Hg}^{2+}$  (0.25 equiv.) in  $\text{H}_2\text{O}/\text{DMSO}$  (1 : 9 , v/v).

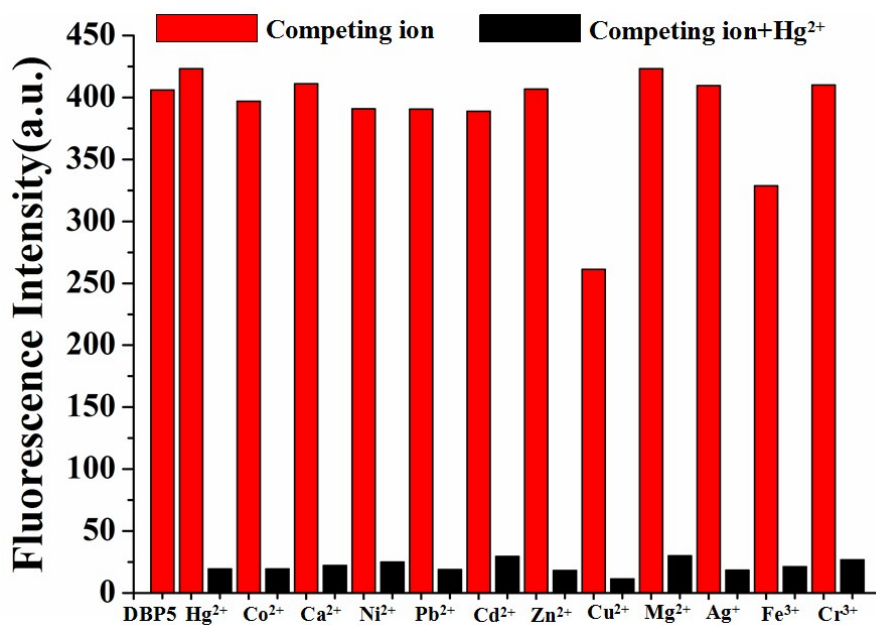

**Fig. S13** Fluorescence of **DBP5I** at 328 nm with addition of 0.4 equiv. of  $\text{Hg}^{2+}$  in the presence of 0.4 equiv. of other cations in  $\text{H}_2\text{O}/\text{DMSO}$  (1 : 9 , v/v) solution.

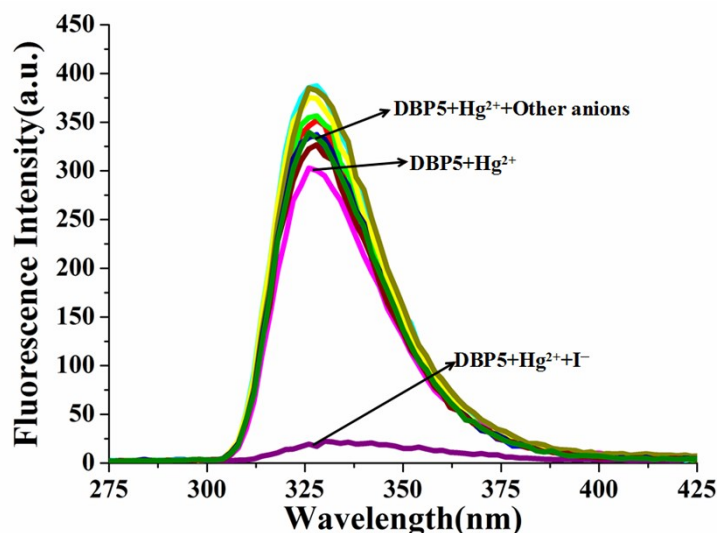

**Fig. S14** Fluorescence spectral response of **DBP5**–**Hg<sup>2+</sup>** system ( $[\text{DBP5}]/[\text{Hg}^{2+}] = 1 : 1$ ,  $[\text{DBP5}] = 2 \times 10^{-4} \text{ M}$ ) in  $\text{H}_2\text{O}/\text{DMSO}$  (1 : 9 , v/v) solution upon addition of 2.0 equiv. of different anions ( $\lambda_{\text{ex}} = 295 \text{ nm}$ ).

### Determination of the detection limit

We use the  $3\delta$  way to figure out the detection limit. The process of the analysis as follows.

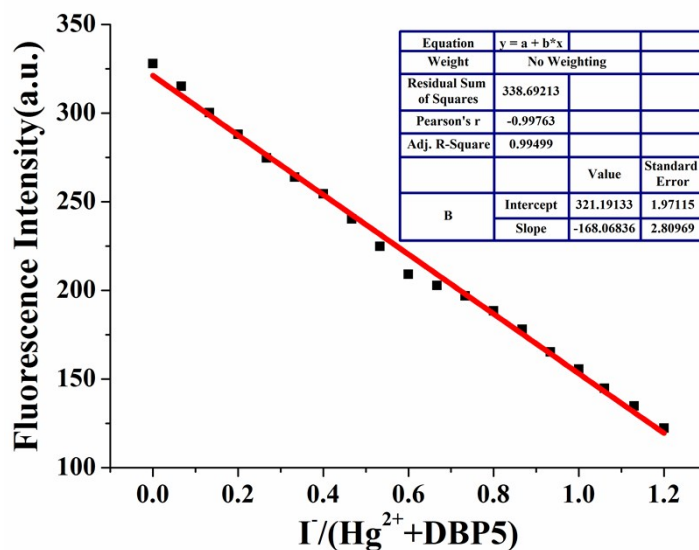

**Fig. S15** The photograph of the linear range.

Linear Equation:  $Y = -168.06836X + 321.19133$   $R^2 = 0.99499$

$S = 168.06836 \times 10^6$

$$\delta = \sqrt{\frac{\sum (x_i - \bar{x})^2}{n-1}} = 19.66 (n = 30)$$

$$\text{LOD} = 3\delta/S = 3.51 \times 10^{-7} \text{ M}$$

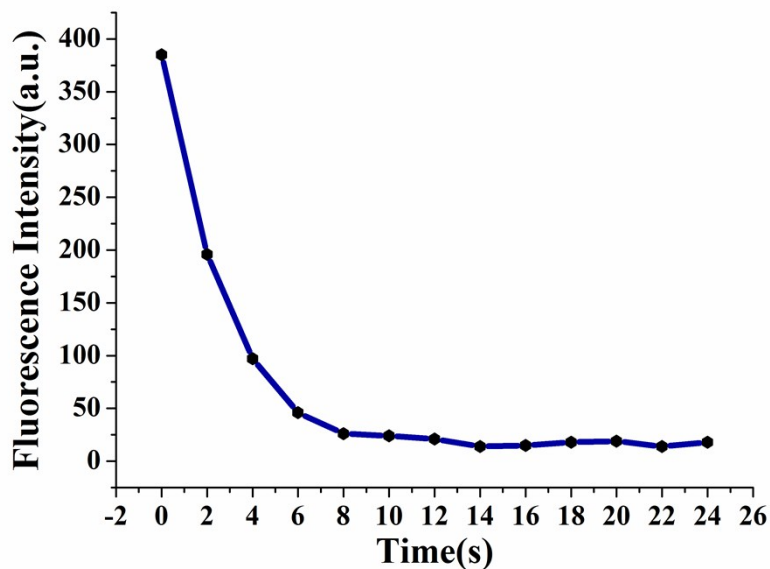

**Fig. S16** Time-dependent of **DBP5**–**Hg<sup>2+</sup>** ( $2 \times 10^{-4}$  M) system upon addition of **I<sup>-</sup>** (2.0 equiv.) in **H<sub>2</sub>O/DMSO** (1 : 9 , v/v) with a plot of the fluorescence intensity that is estimated as the peak height at 328 nm.

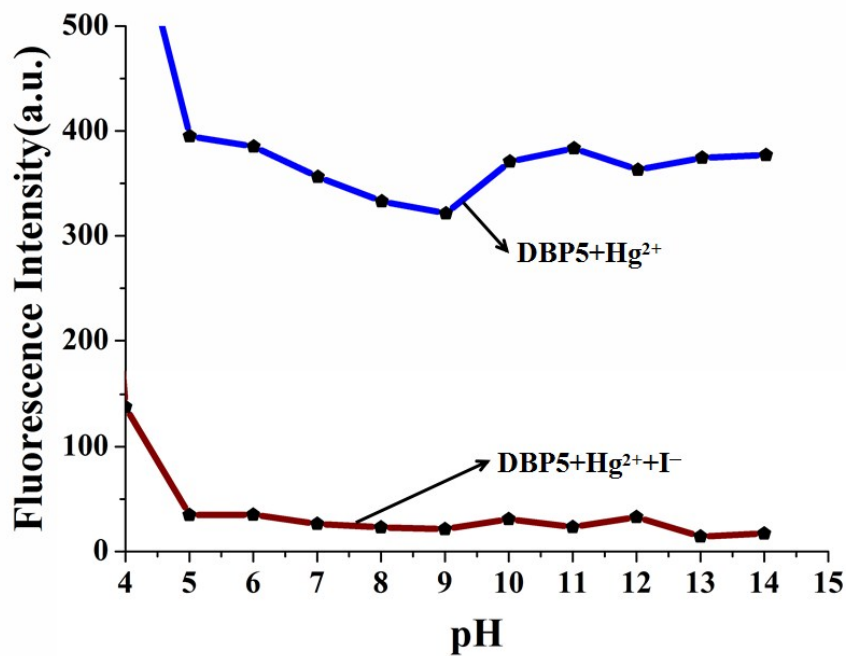

**Fig. S17** Influence of pH on the fluorescence of **DBP5**–**Hg<sup>2+</sup>** ( $2 \times 10^{-4}$  M) system with **I<sup>-</sup>** (2.0 equiv.) in **H<sub>2</sub>O/DMSO** (1 : 9 , v/v).

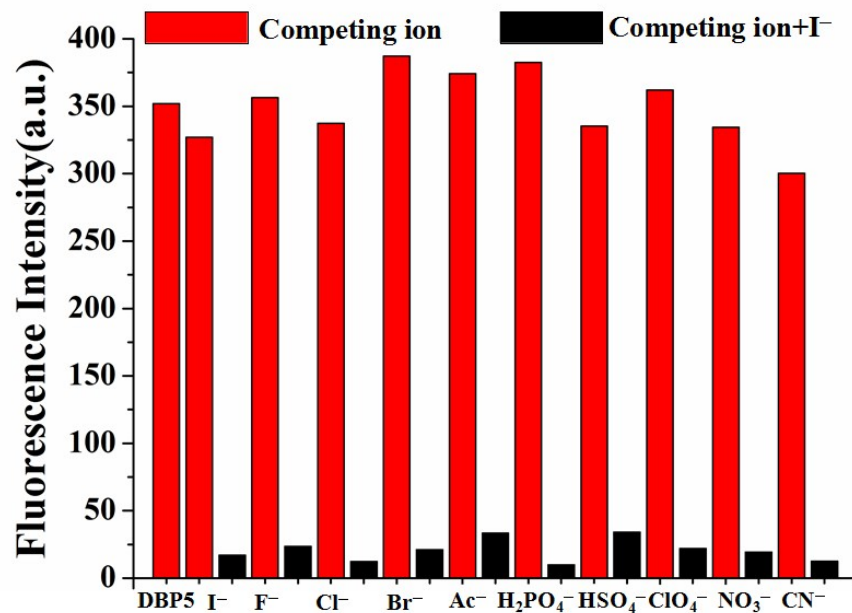

**Fig. S18** Fluorescence of **DBP5**– $\text{Hg}^{2+}$  system at 328 nm with addition of 2.0 equiv. of  $\text{I}^-$  in the presence of 2.0 equiv. of other anions in  $\text{H}_2\text{O}/\text{DMSO}$  (1 : 9, v/v) solution.

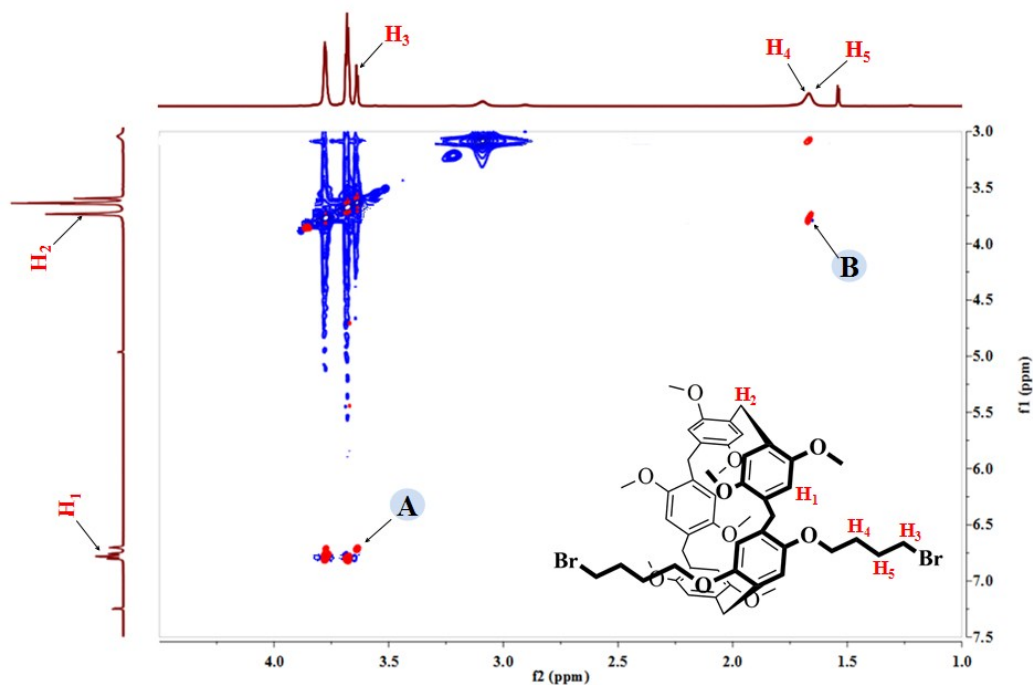

**Fig. S19** The 2D NOESY spectrum of (600 MHz,  $\text{CDCl}_3$ , 298 K) of **DBP5** at 50.0 mM.

cherjingfa-3\_160928113305 #187 RT: 1.46 AV: 1 NL: 5.9954  
T: FIMS+cESI Full ms [300.00-2000.00]

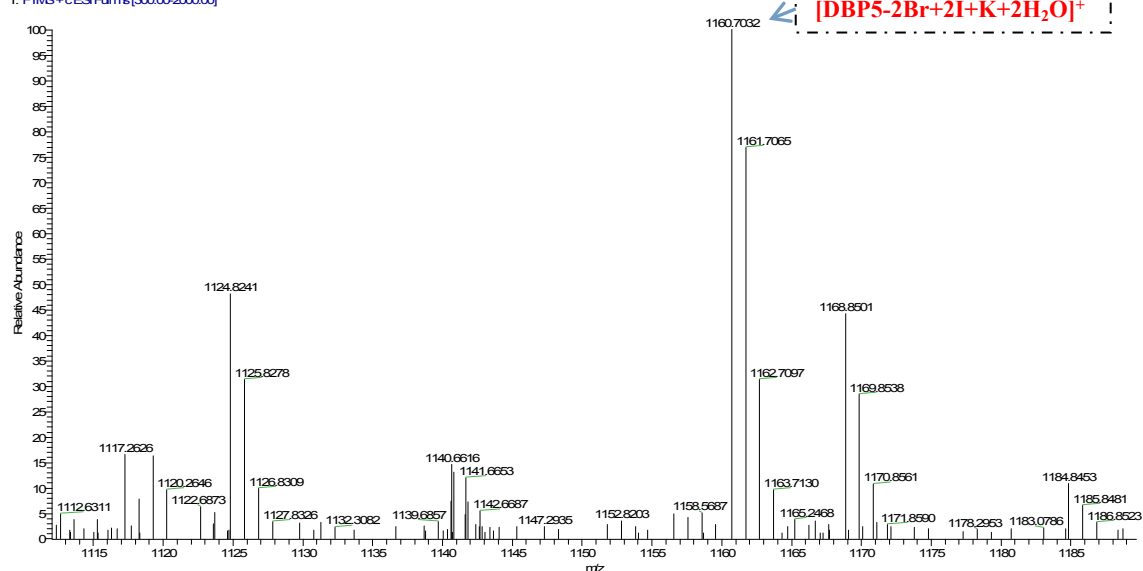

**Fig. S20** High resolution mass data of the system of **DBP5** and  $I^-$ .

cherjingfa-2\_160928113305 #76 RT: 0.58 AV: 1 NL: 1.0954  
T: FIMS+cESI Full ms [300.00-2000.00]

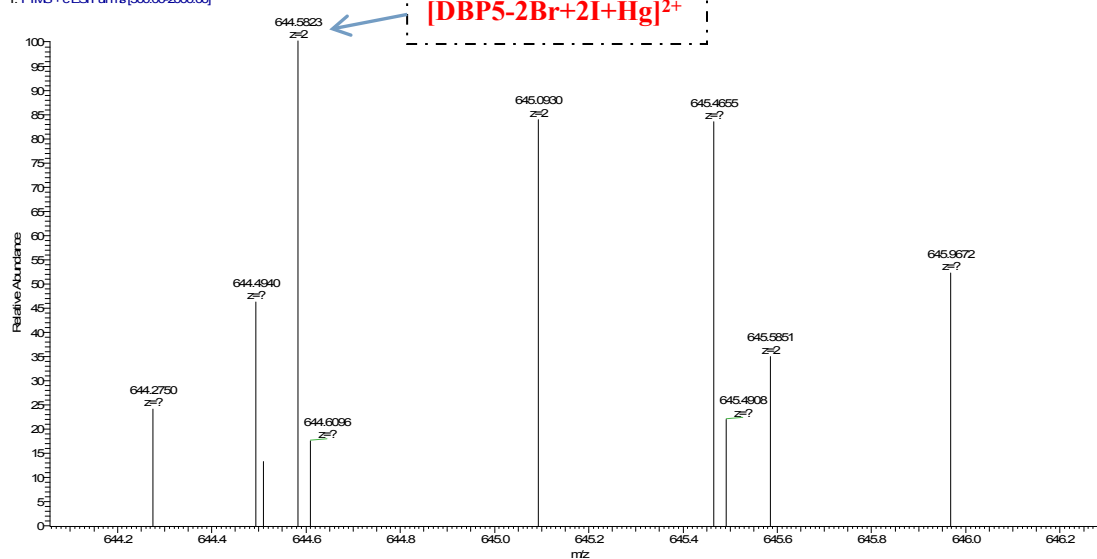

**Fig. S21** High resolution mass data of the complex of **DBP5**– $I^-$  system and  $Hg^{2+}$ .

### 3. Synthesis of the model compound M1

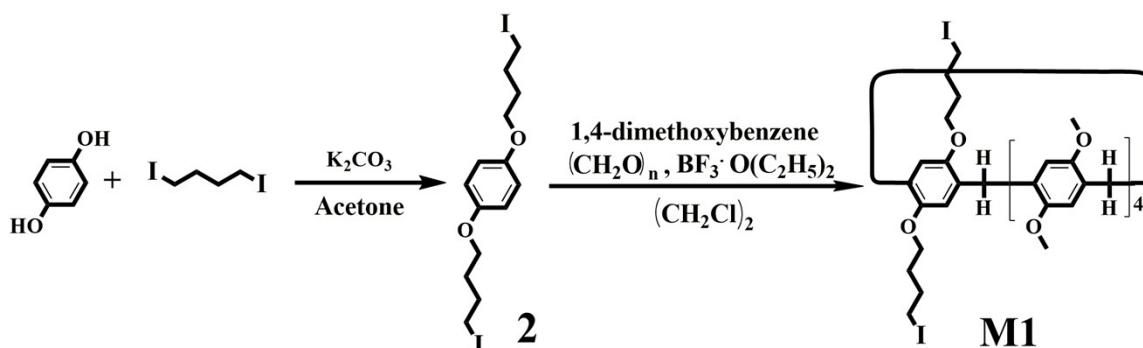

**Scheme S2** Synthesis of the model compound **M1**.

**Synthesis of 1,4-bis(4-iodobutoxy)benzene 2:** Hydroquinone (0.55 g, 5.0 mmol),  $K_2CO_3$  (5.5 g, 40 mmol), 1,4-diiodobutane (12.4 g, 40 mmol) and acetone (200.0 mL) were added in a 250 mL round-bottom flask stirred at room temperature. The reaction mixture was stirred at reflux for 1.5 days. After the solid was filtered off, the solvent was evaporated and the residue was dissolved in  $CH_2Cl_2$ . Column chromatography (silica gel; petroleum ether :  $CH_2Cl_2$  = 10 : 1) afforded a white solid (1.8 g, 76%).  $^1H$  NMR (600 MHz,  $CDCl_3$ )  $\delta$  6.81 (s, 4H), 3.93 (t,  $J$  = 6.1 Hz, 4H), 3.25 (t,  $J$  = 6.9 Hz, 4H), 2.08–1.97 (m, 4H), 1.93–1.80 (m, 4H).  $^{13}C$  NMR (151 MHz,  $CDCl_3$ )  $\delta$  153.06 (s), 115.39 (s), 67.25 (s), 30.22 (d,  $J$  = 7.0 Hz), 6.51 (s).

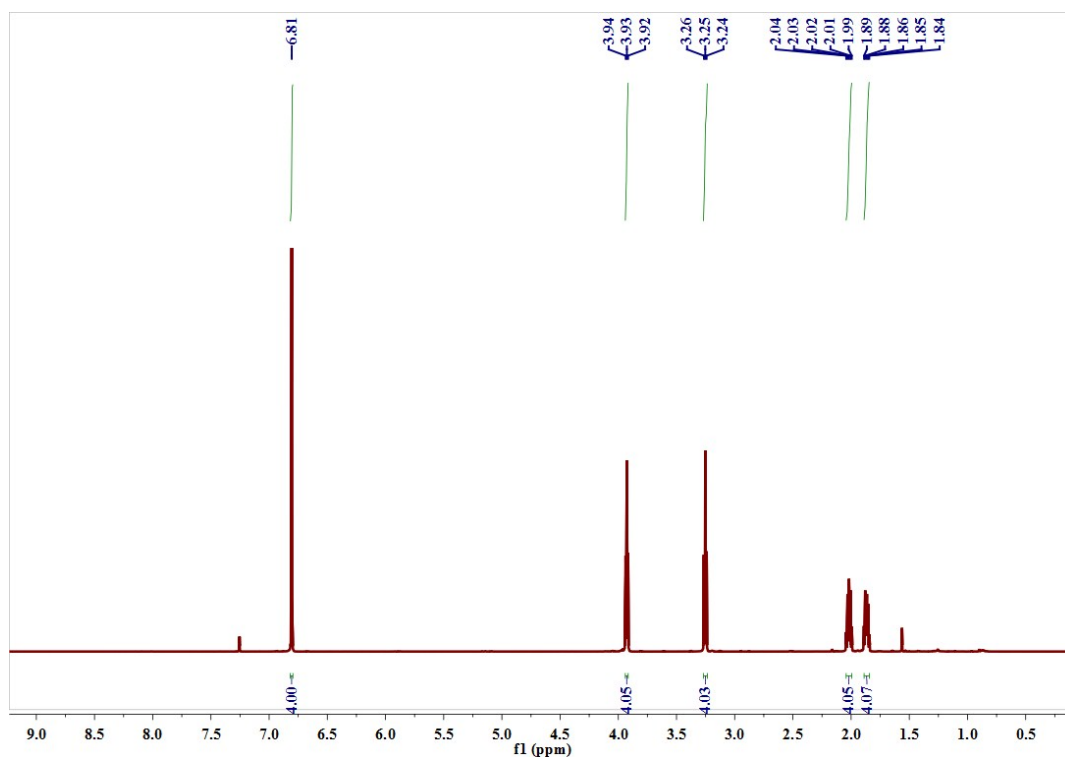

**Fig. S22** <sup>1</sup>H NMR spectra (600 MHz, CDCl<sub>3</sub>) of 1,4-bis(4-iodobutoxyl)benzene **2**.

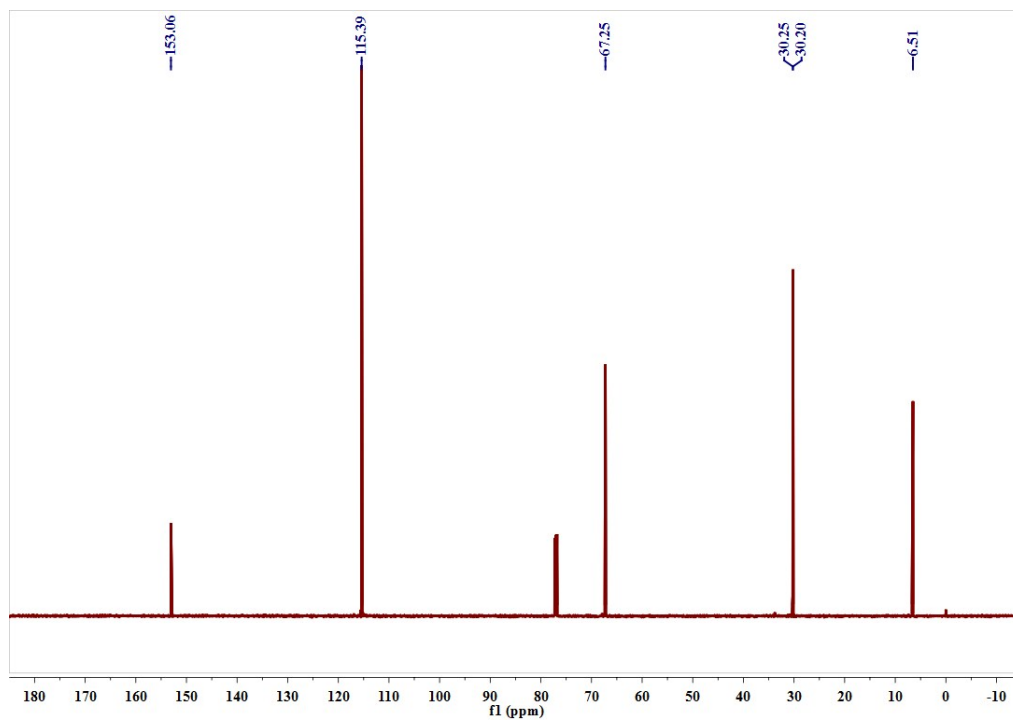

**Fig. S23** <sup>13</sup>C NMR spectra (151 MHz, CDCl<sub>3</sub>) of 1,4-bis(4-iodobutoxyl)benzene **2**.



**Synthesis of the model compound M1:** To a solution of 1,4-bis(4-iodobutoxy)benzene (0.95 g, 2.0 mmol) and 1,4-dimethoxybenzene (1.38 g, 10.0 mmol) in 1, 2-dichloroethane (150 mL), paraformaldehyde (0.36 g, 12.0 mmol) was added under nitrogen atmosphere. Then boron trifluoride diethyl etherate (3.24 mL, 12 mmol) was added to the solution and the mixture was stirred at room temperature for 1 h and concentrated by rotary evaporation. The resultant oil was dissolved in CH<sub>2</sub>Cl<sub>2</sub> and washed twice with H<sub>2</sub>O. The organic layer was dried over anhydrous Na<sub>2</sub>SO<sub>4</sub> and evaporated to afford the crude product, which was isolated by flash column chromatography using petroleum ether/ethyl acetate (20 : 1, v/v) to give **M1** (0.46 g, 21%) as a white solid. <sup>1</sup>H NMR (600 MHz, CDCl<sub>3</sub>) δ 6.81 (t, *J* = 9.4 Hz, 10H), 3.78 (d, *J* = 2.9 Hz, 10H), 3.77 (s, 4H), 3.69 (d, *J* = 6.0 Hz, 24H), 3.65 (s, 4H), 1.65 (s, 8H). <sup>13</sup>C NMR (151 MHz, CDCl<sub>3</sub>) δ 151.74–149.00 (m), 128.23 (dd, *J* = 31.5, 22.0 Hz), 114.17 (dd, *J* = 101.1, 71.0 Hz), 67.15 (s), 55.86 (dd, *J* = 36.1, 15.3 Hz), 29.94 (dd, *J* = 101.1, 61.1 Hz), 6.41 (s). ESI-MS *m/z*: (M+Na)<sup>+</sup> Calcd for C<sub>51</sub>H<sub>60</sub>I<sub>2</sub>NaO<sub>10</sub> 1109.2168; Found 1109.2160.

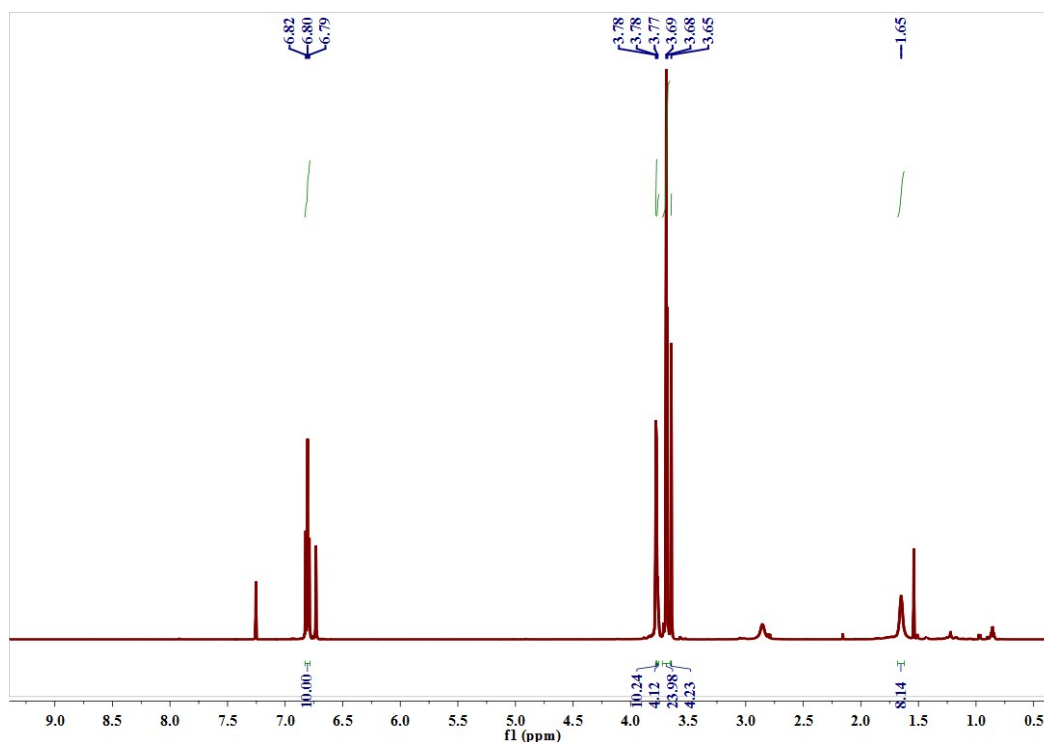

**Fig. S24** <sup>1</sup>H NMR spectra (600 MHz, CDCl<sub>3</sub>) of the model compound **M1**.

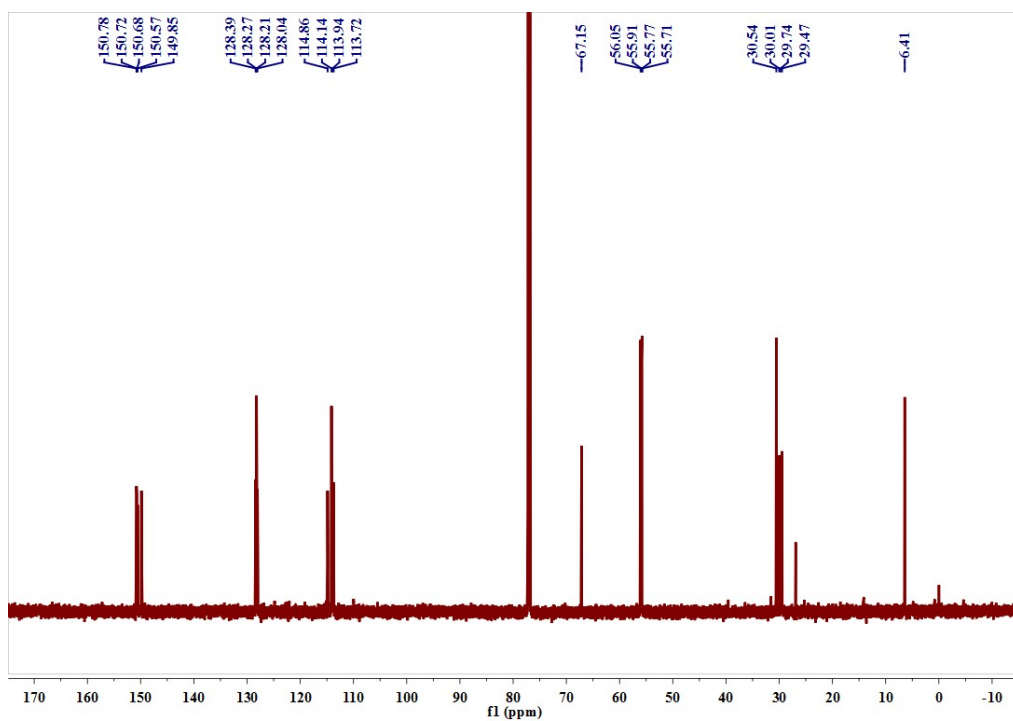

**Fig. S25** <sup>13</sup>C NMR spectra (151 MHz, CDCl<sub>3</sub>) of the model compound **M1**.

## Generic Display Report

### Analysis Info

Analysis Name D:\Data\user\dingjindong20170825-2.d  
Method tune\_low.m  
Sample Name 2  
Comment

Acquisition Date 2017-8-26 16:19:48

Operator BDAL@DE  
Instrument micrOTOF-Q

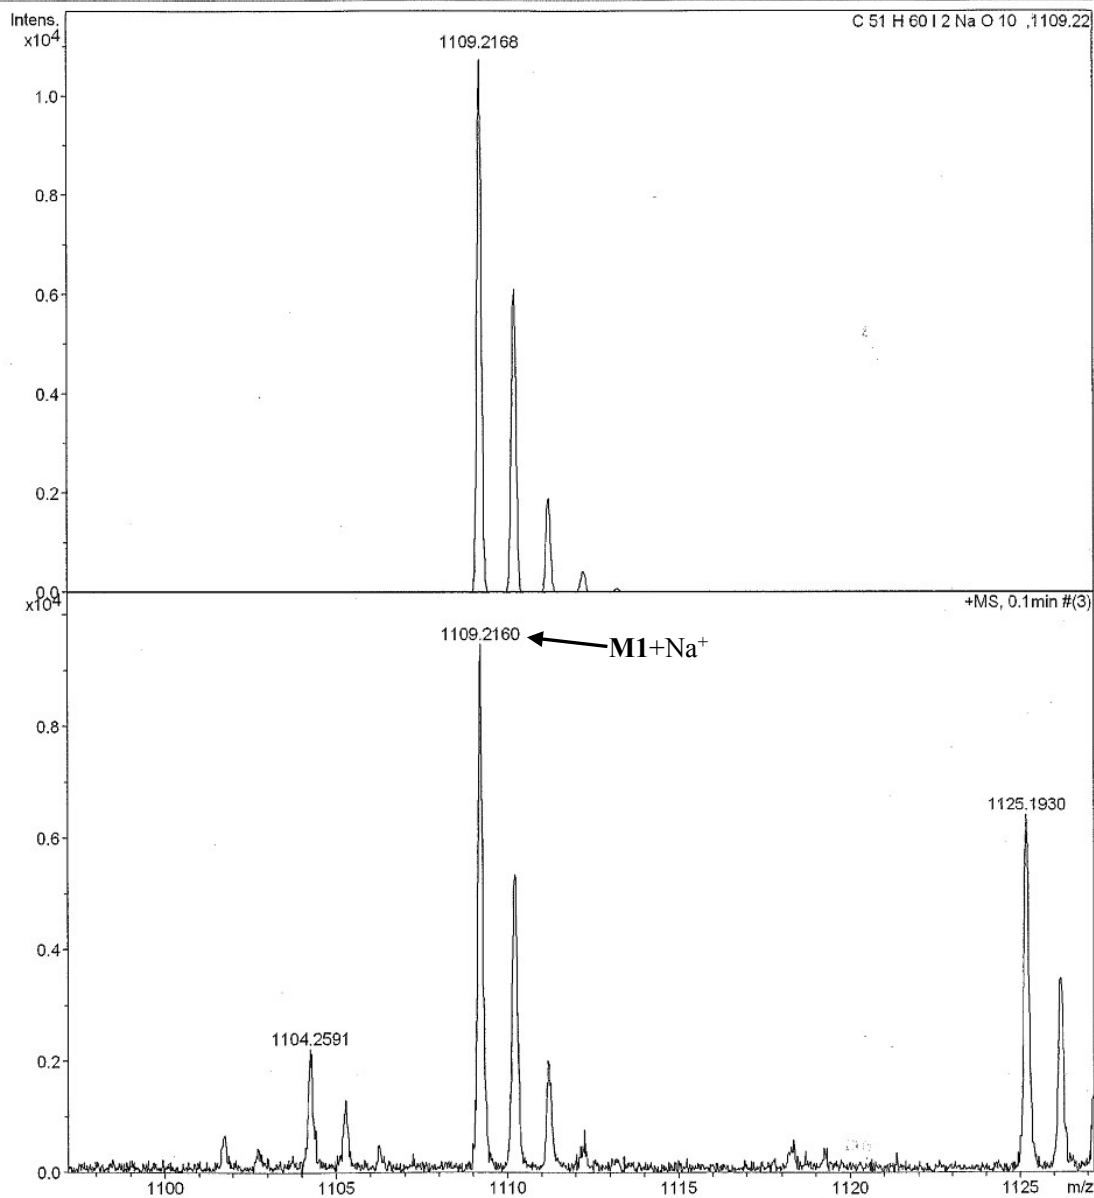

**Fig. S26** High resolution mass data of the model compound **M1**.

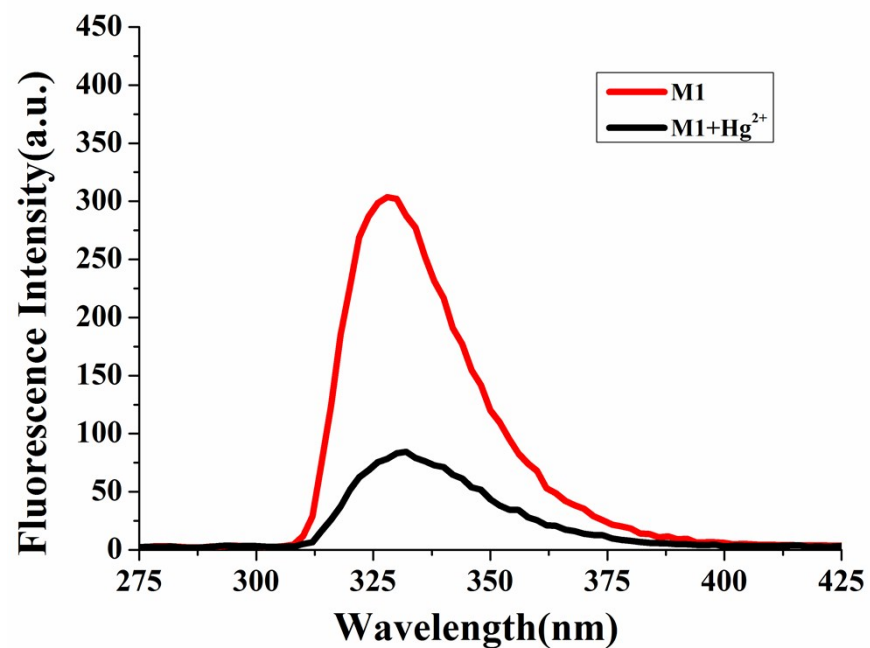

**Fig. S27** Fluorescence spectral response of **M1** ( $2 \times 10^{-4}$  M) in H<sub>2</sub>O/DMSO (1 : 9 , v/v) solution upon addition of 2.0 equiv. of Hg<sup>2+</sup> ( $\lambda_{\text{ex}} = 295$  nm).

---

\* Corresponding author. Tel: +86 931 7970394.

E-mail address: [weitaibao@126.com](mailto:weitaibao@126.com).
